# Supplementary material for: Oral Peptide Vaccine against Hookworm Infection: Correlation of Antibody Titers with Protective Efficacy
Source: MDPI journal article supplement (doi:10.3390/vaccines9091034), 2021-09-17
Supplement: s1 [file s1]

## Supplementary Materials

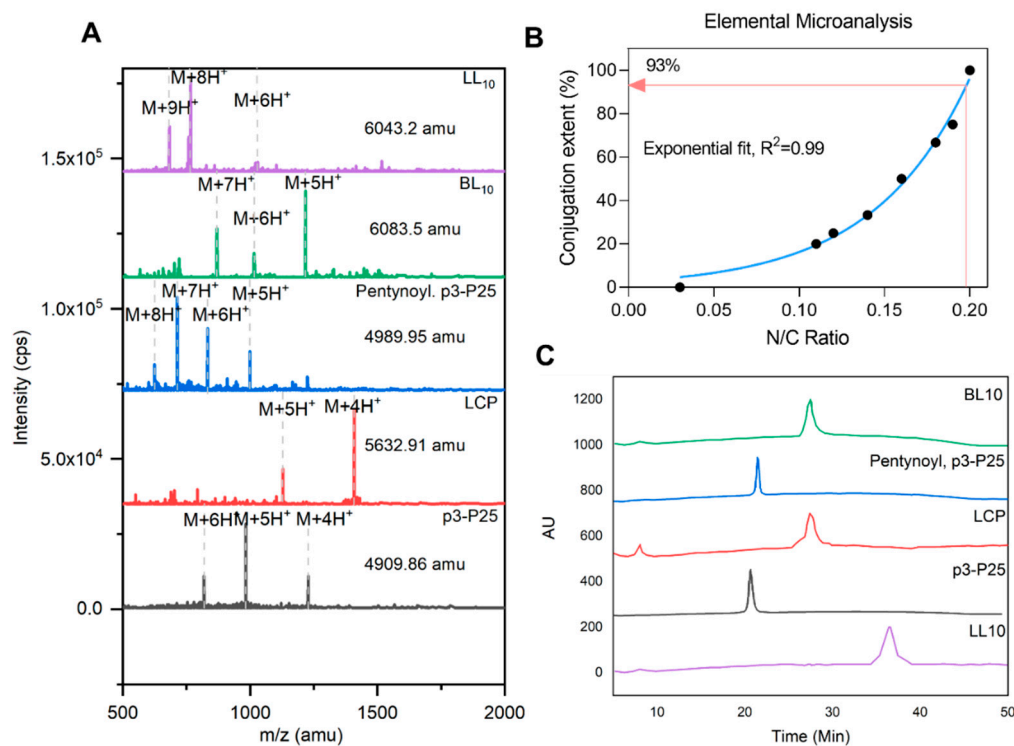

**Figure S1.** Physicochemical characterization of vaccine candidates: MS-ESI spectra (A); elemental analysis (B); and HPLC chromatograms (C). Typical signal broadening can be observed for amphiphile conjugates, LL10, BL10 and LCP.

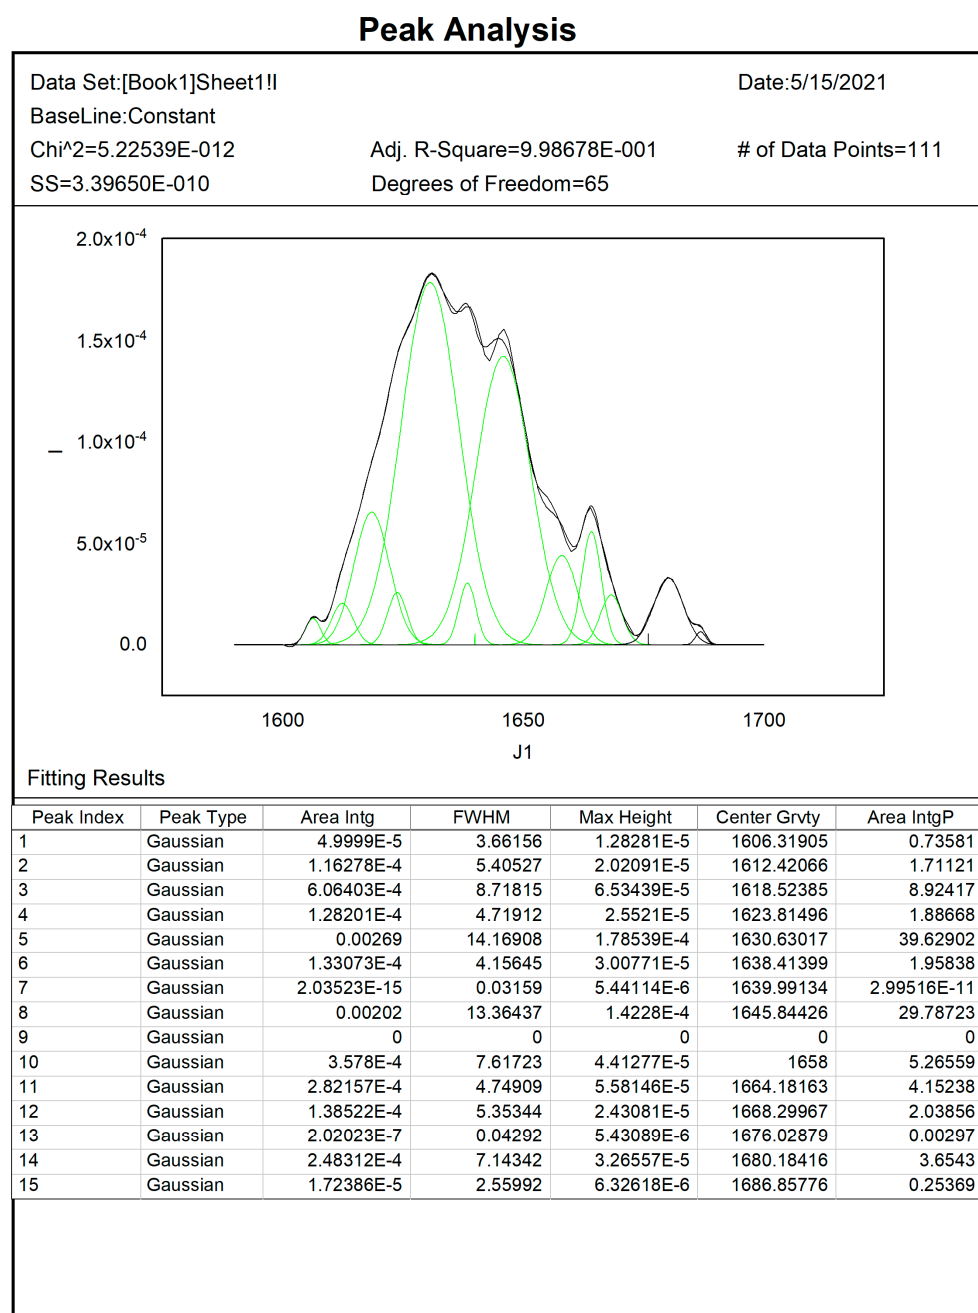

**Figure S2.** An example of secondary structure determination by FTIR-ATR.

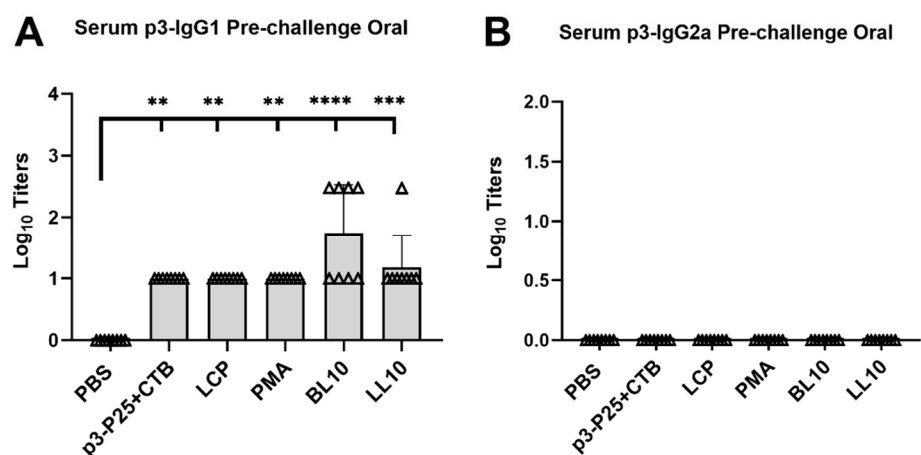

**Figure S3.** Subclasses of serum p3-IgG titers: A) serum p3-IgG1 titers, and B) serum p3-IgG2a titers. These demonstrate that the main IgG subclass is of the neutralizing IgG1 type. The horizontal dashed line represents the starting dilution.

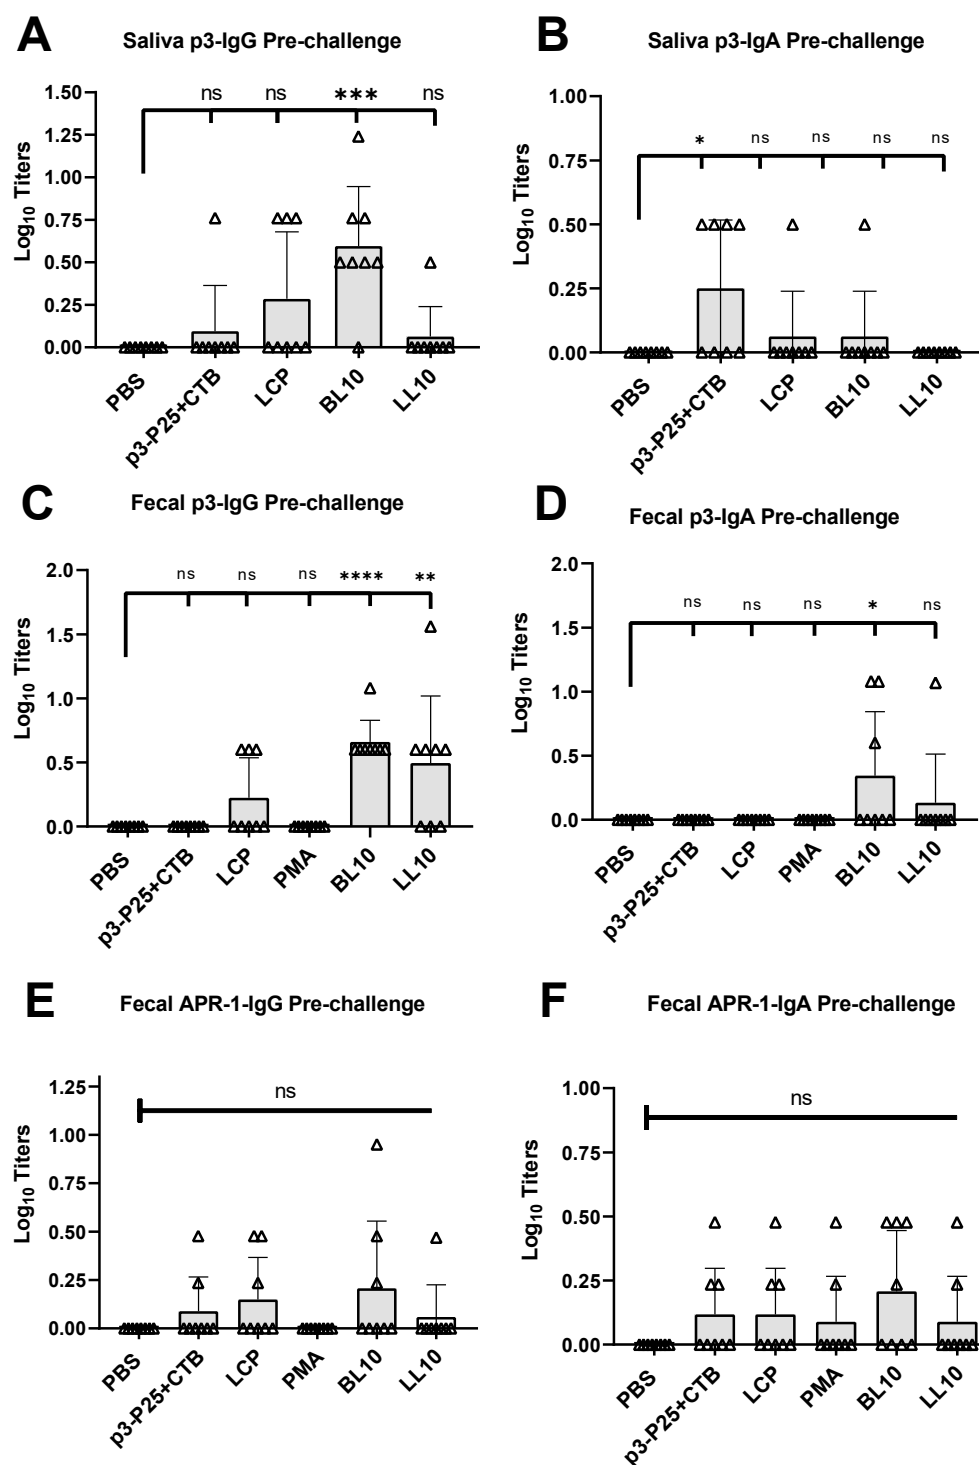

**Figure S4.** Pre-challenge salivary p3-IgG (A) and p3-IgA (B), fecal p3-IgG (C), fecal p3-IgA (D), fecal APR-1-IgG (E), and fecal APR-1-IgA (F) log<sub>10</sub> titers.

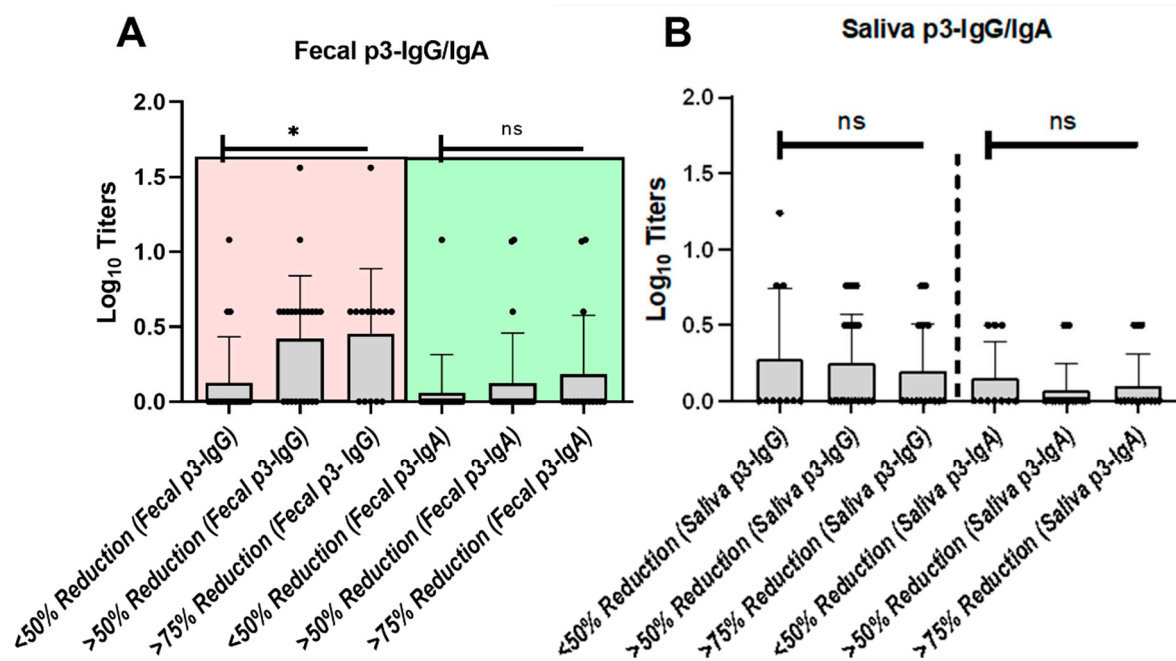

Figure S5. Protective capacity of fecal p3-IgG/IgA (A), and salivary p3-IgG/IgA titers (B).

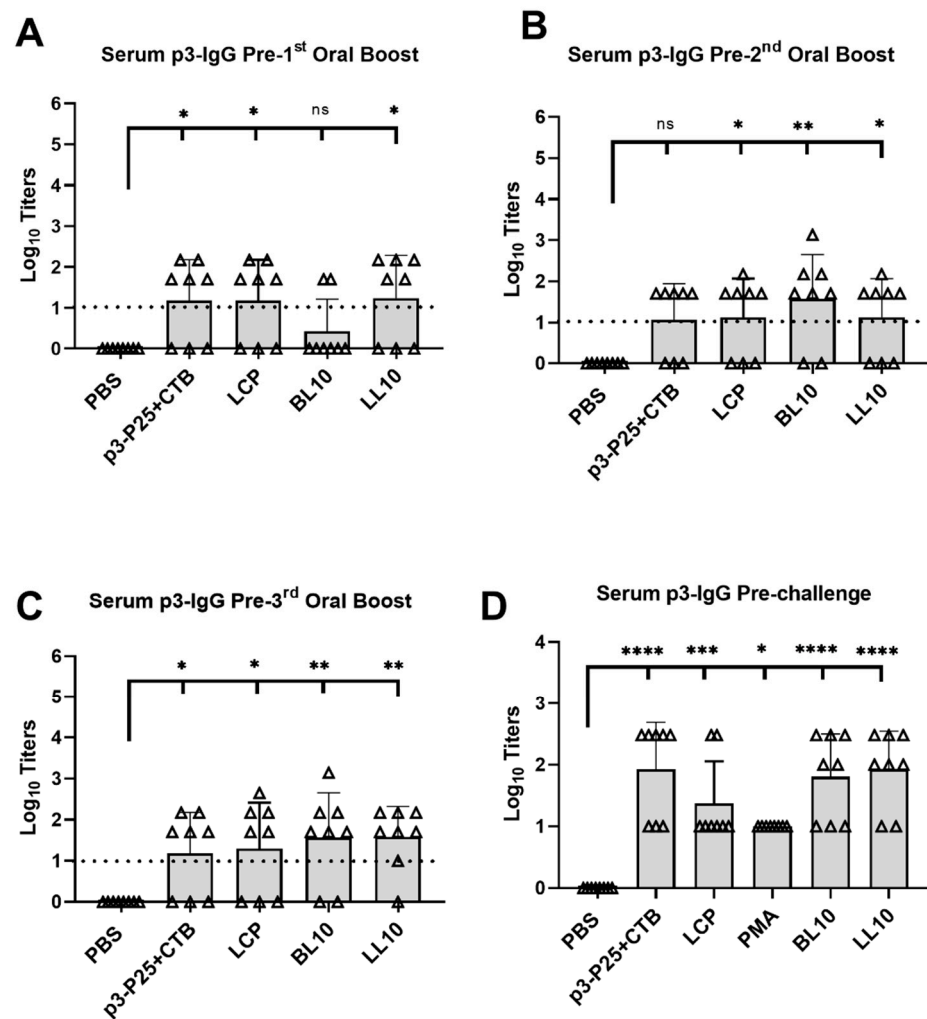

**Figure S8.** Serum anti-p3 IgG titers after 1<sup>st</sup> immunization (A), 2<sup>nd</sup> immunization (B), 3<sup>rd</sup> immunization (C), and 4<sup>th</sup> immunization (D).

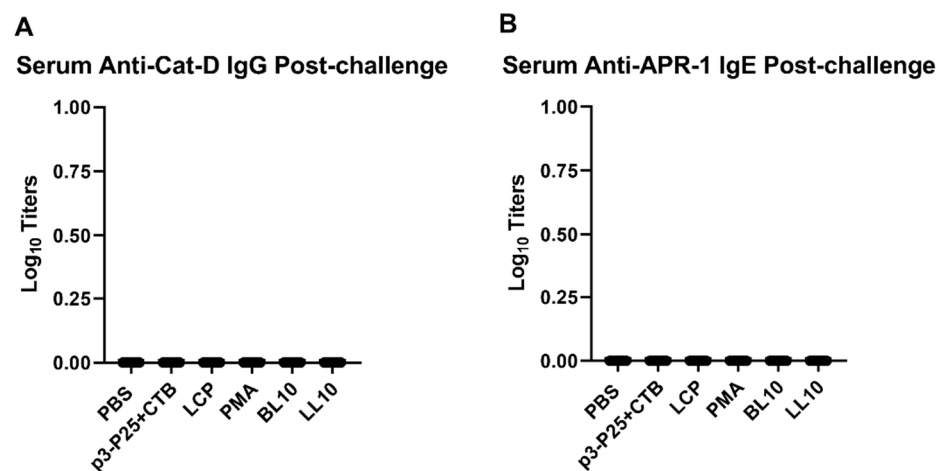

**Figure S9.** Serum anti-human cathepsin-D IgG titers (A), and serum anti-APR-1 IgE titers were both undetectable using post-challenge mice sera.

## CLUSTAL 2.1 multiple sequence alignment

```

Mouse      MKTPGVLLILGLLASSFAIRIPLRKFTSIRRTMTEVGGSVEDLILGPITKYSMQ--
Human      MQPSSLLPLALCLLAAPASALVRIPLHKFTSIRRTMSEVGGSVEDLIAKGPVSKYSQA--
APR-1      -MARLVFLLVLCTLAASVHRRLFHQARRHVTSVLSRQPTLRERLIASGSWEDYQKQRY
           .  :: * * **.: : : : : * * *. *.

Mouse      -----SSPKTTEPVSELLKNYLDAQYYGDIGIGTPQCFTVVFDTGSSNL
Human      -----VPAVTEGPIPEVLKNYMDAQYYGEIGIGTPQCFTVVFDTGSSNL
APR-1      HYRKKILAKYAANKASKLQSANEIDELLRNYMDAQYYGVIQIGTPAQNFVIFDTGSSNL
           : : *:*:*:*:* * *:* * *:*:*:*

Mouse      WVPSIHCKILDIAKWVHHKYNDSKSTYVKNGTSFDIHYGSGSLSGYLSQDTSVPCKSD
Human      WVPSIHCKLLDIACWIHHKYNDSKSTYVKNGTSFDIHYGSGSLSGYLSQDTSVPCKSA
APR-1      WVPSRKCPFYDIACMLHHRYSYGASSTYKEDGRKMAIQYGTGSMKGFISKDIVCIAG---
           **** * : * * :*:**. **** :* .: *:*:*:*:*:*:*

Mouse      QSKARG--IKVEKQIFGEATKQPGIVFAAKFDGILGMGYPHISVNNVLPVFDNLMQKKL
Human      SSASALGGVKVERQVFGEATKQPGITFIAAKFDGILGMAYPRISVNNVLPVFDNLMQKKL
APR-1      -----ICAEQPF AEATSEPGLTFIAAKFDGILGMAFPEIAVLGVTPVFHTFIEQKK
           : ,* * ,* * ,* * ,* * ,* * ,* * ,* * ,* * ,* * ,* *

Mouse      VDKNIFSFYLNRPDQPGGELMLGGTDSKYHGEISYLVNTRKAYWQVHMDQLEVGNEL
Human      VDQNIFFSYLSRDPDAQPGGELMLGGTDSKYKGSLSYLVNTRKAYWQVHLDQVEVASGL
APR-1      VPSPVFAFWLNRNPESEIGGEITFGGVDTRRYVEPITWTPVTRRGYWQFKMDMVQGGSSS
           * . :*:*:*:*:*.: ***: :*:*:* * : : : ***:***:*** : : .

Mouse      TLCKGGCEAIVDTGTSLLVGPVEEVKELQKAIGAVPLIQGEYMPCEKVSSLPTVYLKLG
Human      TLCKEGCEAIVDTGTSLMVGPVDEVRELQKAIGAVPLIQGEYMPCEKVSTLPAITLKLK
APR-1      IACPNGCQAIADTG TSLIAGPKAQVEAIQKYIGAEPLMKGEYMPCDKVPSLPDVSFIID
           * *:*:*:*:*:*:*:* * : * : * * * * :*:*:*:*:*:*:*:* : : .

Mouse      GKNYELHPDKYILKVSQGGKICLSGFMGM DIPPSGPLWILGDVFIGSYTYTFDRDNNR
Human      GKGYKLSPEYTLKVSQAGKTLCLSGFMGM DIPPSGPLWILGDVFIGRYTYTFDRDNNR
APR-1      GKTFTLKGEDVYLTVKAAGKSICLSGFMGMDFPEKIGELWILGDVFIGYTYTFDVGGQAR
           ** : * : * * ,* * ,* * ,* * ,* * ,* * ,* * ,* * ,* * ,* *

Mouse      VGFANAVVL-----
Human      VGFAEAARL-----
APR-1      VGFAQAKSEDGFPVGTPTVTRFRQLQEDSDSDEDDVFTF
           ***:*
```

Figure S10. Protein sequences alignment of mouse cathepsin-D, Human cathepsin-, and Na-APR-1, orange highlighted sequence showing lack of similarity of p3 epitope (APR-1) to corresponding sequences in mouse or human cathepsin-D sequences. Mouse cathepsin-D (UniProt P18242) sequence is 89% identical to human cathepsin (UniProt P07339), and only 46% identical to hookworm Na-APR-1 enzyme sequence (UniProt Q9N9H3) using CLUSTALW.
